# Supplementary material for: Root-Associated Entomopathogenic Fungi Modulate Their Host Plant’s Photosystem II Photochemistry and Response to Herbivorous Insects
Source: MDPI journal article supplement (doi:10.3390/molecules27010207), 2021-12-29
Supplement: s1 [file s1]

# Root-Associated Entomopathogenic Fungi Modulate their Host Plant's Photosystem II Photchemistry and Response to Herbivorous Insects

Julietta Moustaka \*, Nicolai Vitt Meyling and Thure Pavlo Hauser \*

**Table S1.** Comparison of the Untreated and Treated Controls, showing P values for pairwise comparisons with post hoc tests and Dunn-Šidák correction.

| Symbol        | Parameter                                                                           | Untreated vs Treated Control |       |
|---------------|-------------------------------------------------------------------------------------|------------------------------|-------|
|               |                                                                                     | Before                       | After |
| $\Phi_{PSII}$ | Effective quantum yield of PSII photochemistry                                      | 0.697                        | 1     |
| $\Phi_{NPQ}$  | Quantum yield of regulated non photochemical energy loss in PSII                    | 1                            | 1     |
| $\Phi_{NO}$   | Quantum yield of non-regulated loss in PSII                                         | 0.001                        | 1     |
| NPQ           | Non-photochemical quenching reflecting the dissipation of excitation energy as heat | 0.582                        | 0.999 |
| qP            | Electron transport rate                                                             | 0.029                        | 0.225 |
| ETR           | Photochemical quenching, representing the fraction of open PSII reaction centers    | 0.703                        | 1     |
| EXS           | Excess excitation energy                                                            | 0.33                         | 0.797 |

**Table S2.** Percentage pairwise differences between the experimental treatments for  $\Phi_{NPQ}$  (upper right yellow quadrant) and  $\Phi_{PSII}$  (lower left blue quadrant). Green and red colors indicate increases and decreases, respectively, bold numbers indicate significant differences at  $p < 0.05$ . Untreated and Treated Controls were combined; see Table S1.

| $\Phi_{NPQ}$ / $\Phi_{PSII}$ |                    | Before  |                    |                    | After   |                    |                    |
|------------------------------|--------------------|---------|--------------------|--------------------|---------|--------------------|--------------------|
|                              |                    | Control | <i>M. brunneum</i> | <i>B. bassiana</i> | Control | <i>M. brunneum</i> | <i>B. bassiana</i> |
| Before                       | Control            |         | 12                 | 9                  | 18      |                    |                    |
|                              | <i>M. brunneum</i> | 15      |                    | 2                  |         | 22                 |                    |
|                              | <i>B. bassiana</i> | 8       | 8                  |                    |         |                    | 19                 |
| After                        | Control            | 20      |                    |                    |         | 5                  | 7                  |
|                              | <i>M. brunneum</i> |         | 32                 |                    | 7       |                    | 3                  |
|                              | <i>B. bassiana</i> |         |                    | 24                 | 5       | 2                  |                    |

**Table S3.** Percentage pairwise differences between the experimental treatments for  $q_P$  (upper right yellow quadrant) and  $\Phi_{NO}$  (lower left blue quadrant). Green and red colors indicate increases and decreases, respectively, bold numbers indicate significant differences at  $p < 0.05$ . Untreated and Treated Controls were combined for  $q_P$ , see Table S1.

| $q_P$<br>$\Phi_{NO}$ |                    | Before            |                 |                    |                    | After    |                    |                    |
|----------------------|--------------------|-------------------|-----------------|--------------------|--------------------|----------|--------------------|--------------------|
|                      |                    | Untreated Control | Treated Control | <i>M. brunneum</i> | <i>B. bassiana</i> | Controls | <i>M. brunneum</i> | <i>B. bassiana</i> |
| Before               | Untreated Control  |                   | 15              | 22                 | 18                 | 6.5      |                    |                    |
|                      | Treated Control    | 9                 |                 | 9                  | 4                  | 25       |                    |                    |
|                      | <i>M. brunneum</i> | 8                 | 1               |                    | 5                  |          | 27                 |                    |
|                      | <i>B. bassiana</i> | 3                 | 6               | 5                  |                    |          |                    | 22                 |
| After                | Controls           | 8.6               | 0.16            |                    |                    |          | 7                  | 7                  |
|                      | <i>M. brunneum</i> |                   |                 | 5                  |                    | 4        |                    | 0.27               |
|                      | <i>B. bassiana</i> |                   |                 |                    | 3.7                | 2        | 6                  |                    |

**Table S4.** Percentage pairwise differences between the experimental treatments for ETR (upper right yellow quadrant) and NPQ (lower left blue quadrant). Green and red colors indicate increases and decreases, respectively, bold numbers indicate significant differences at  $p < 0.05$ . Untreated and Treated Controls were combined, see Table S1.

| ETR<br>NPQ |                    | Before  |                    |                    | After   |                    |                    |
|------------|--------------------|---------|--------------------|--------------------|---------|--------------------|--------------------|
|            |                    | Control | <i>M. brunneum</i> | <i>B. bassiana</i> | Control | <i>M. brunneum</i> | <i>B. bassiana</i> |
| Before     | Control            |         | 15                 | 8                  | 21      |                    |                    |
|            | <i>M. brunneum</i> | 9       |                    | 8                  |         | 32                 |                    |
|            | <i>B. bassiana</i> | 11      | 2                  |                    |         |                    | 30                 |
| After      | Control            | 22      |                    |                    |         | 6                  | 5                  |
|            | <i>M. brunneum</i> |         | 28                 |                    | 0       |                    | 2                  |
|            | <i>B. bassiana</i> |         |                    | 23                 | 9       | 9                  |                    |

**Table S5.** Percentage pairwise differences between the experimental treatments for EXC. Green and red colours indicate increases and decreases, respectively, bold numbers indicate significant differences at  $p < 0.05$ . Untreated and Treated Controls were combined, see Table S1.

| Excess Excitation Energy |                    | Before  |                    |                    | After   |                    |                    |
|--------------------------|--------------------|---------|--------------------|--------------------|---------|--------------------|--------------------|
|                          |                    | Control | <i>M. brunneum</i> | <i>B. bassiana</i> | Control | <i>M. brunneum</i> | <i>B. bassiana</i> |
| Before                   | Control            |         |                    |                    |         |                    |                    |
|                          | <i>M. brunneum</i> | 12      |                    |                    |         |                    |                    |
|                          | <i>B. bassiana</i> | 8       | 4                  |                    |         |                    |                    |
| After                    | Control            | 16      |                    |                    |         |                    |                    |
|                          | <i>M. brunneum</i> |         | 19                 |                    | 7       |                    |                    |
|                          | <i>B. bassiana</i> |         |                    | 16                 | 7       | 0.03               |                    |

**Table S6.** Statistical significance of pairwise differences between different leaflet zones (feeding spot, surrounding zone, and rest of leaf) for  $\Phi_{NPQ}$  (upper right yellow quadrant) and  $\Phi_{PSII}$  (lower left blue quadrant). Significance at  $p < 0.001$  is indicated by \*\*\*, otherwise actual  $p$  values are given with significance at  $p < 0.05$  indicated by bold type.

| $\Phi_{NPQ}$<br>$\Phi_{PSII}$ |          | Control |          |      | <i>M. brunneum</i> |          |      | <i>B. bassiana</i> |          |      |
|-------------------------------|----------|---------|----------|------|--------------------|----------|------|--------------------|----------|------|
|                               |          | Feed    | Surround | Rest | Feed               | Surround | Rest | Feed               | Surround | Rest |
| Control                       | Feed     |         | ***      | ***  | 0.17               |          |      | ***                |          |      |
|                               | Surround | ***     |          | 0.96 |                    | 0.65     |      |                    | 0.11     |      |
|                               | Rest     | ***     | 1        |      |                    |          | 0.18 |                    |          | 0.13 |
| <i>M. brunneum</i>            | Feed     | 0.19    |          |      |                    | ***      | ***  | 0.03               |          |      |
|                               | Surround |         | 0.27     |      | ***                |          | 0.55 |                    | 0.26     |      |
|                               | Rest     |         |          | 0.04 | ***                | 0.97     |      |                    |          | 0.84 |
| <i>B. bassiana</i>            | Feed     | 0.01    |          |      | 0.37               |          |      |                    | ***      | ***  |
|                               | Surround |         | 0.23     |      |                    | 0.94     |      | ***                |          | 1    |
|                               | Rest     |         |          | 0.18 |                    |          | 0.42 | ***                | 0.99     |      |

**Table S7.** Statistical significance of pairwise differences between different leaflet zones (feeding spot, surrounding zone, and rest of leaf) for  $\Phi_{NO}$ . Significance at  $p < 0.001$  is indicated by \*\*\*, at  $p < 0.01$  by \*\*, otherwise actual  $p$  values are given with significances at  $p < 0.05$  indicated by bold type.

| $\Phi_{NO}$        |          | Control |          |      | <i>M. brunneum</i> |          |      | <i>B. bassiana</i> |          |      |
|--------------------|----------|---------|----------|------|--------------------|----------|------|--------------------|----------|------|
|                    |          | Feed    | Surround | Rest | Feed               | Surround | Rest | Feed               | Surround | Rest |
| Control            | Feed     |         |          |      |                    |          |      |                    |          |      |
|                    | Surround | ***     |          |      |                    |          |      |                    |          |      |
|                    | Rest     | ***     | 0.81     |      |                    |          |      |                    |          |      |
| <i>M. brunneum</i> | Feed     | ***     |          |      |                    |          |      |                    |          |      |
|                    | Surround |         | 0.30     |      | ***                |          |      |                    |          |      |
|                    | Rest     |         |          | 0.23 | ***                | 0.68     |      |                    |          |      |
| <i>B. bassiana</i> | Feed     | ***     |          |      | **                 |          |      |                    |          |      |
|                    | Surround |         | 0.71     |      |                    | 0.26     |      | ***                |          |      |
|                    | Rest     |         |          | 0.85 |                    |          | 0.33 | ***                | 0.99     |      |

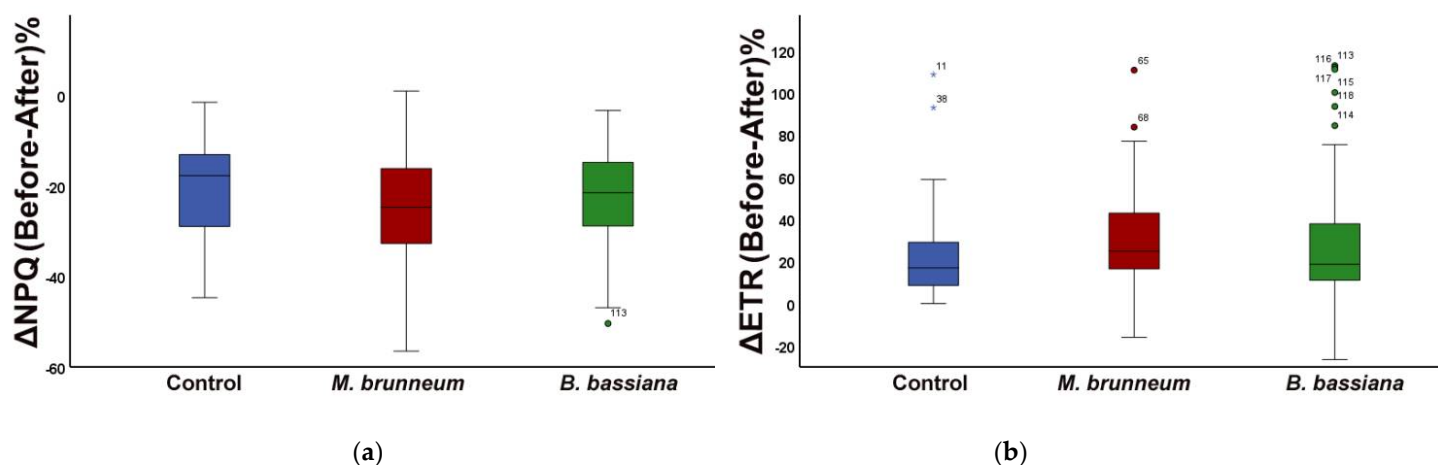

**Figure S1.** Graphs showing percentage changes from Before to After herbivory for **(a)** non-photochemical quenching (NPQ) and **(b)** electron transport rate (ETR), shown for Control plants (blue), *M. brunneum* inoculated plants (red), and *B. bassiana* inoculated plants (green). Boxes and whiskers indicate the 10, 25, 50, 75 and 90 percentiles. Circles and asterisks indicate outliers.

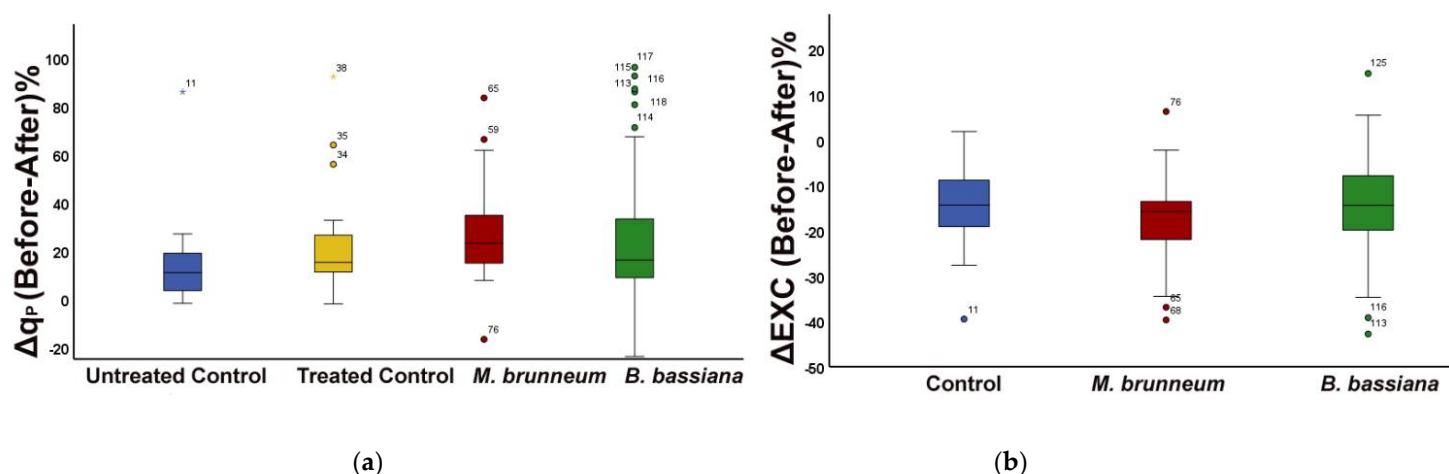

**Figure S2.** Graphs showing percentage changes from Before to After herbivory for **(a)** photochemical quenching ( $q_P$ ) and **(b)** excess excitation energy in PSII (EXC), shown for Untreated and Treated Control plants (blue and yellow), *M. brunneum* inoculated plants (red), and *B. bassiana* inoculated plants (green). Boxes and whiskers indicate the 10, 25, 50, 75 and 90 percentiles. Circles and asterisks indicate outliers.
